# Supplementary material for: ATAD5 regulates the lifespan of DNA replication factories by modulating PCNA level on the chromatin
Source: PubMed Central journal article supplement — J Cell Biol. 2013 Jan 7;200(1):31–44. doi: 10.1083/jcb.201206084 (PMC3542800; doi:10.1083/jcb.201206084), 2013-01-07
Supplement: supp_jcb.201206084_JCB_201206084_sm.pdf [file supp_jcb.201206084_JCB_201206084_sm.pdf]

Lee et al., <http://www.jcb.org/cgi/content/full/jcb.201206084/DC1>

Figure S1. **ATAD5 knockdown generates abnormally large PCNA foci.** In all experiments, cells were transfected with *ATAD5* or control siRNA and analyzed after 72 h incubation unless otherwise specified. (A, B, and D) RPE cell. (A) After extracting soluble proteins, cells were fixed, stained with anti-PCNA antibody, and analyzed by confocal microscopy. (B) Box blot showing the quantitation of chromatin-bound PCNA signal intensity using Image-Pro Plus 7.0 software (Media Cybernetics). The data shown are from a single representative experiment out of three repeats. For the experiment shown,  $n > 200$  for each condition. A.U., arbitrary unit; red bars in the graph, mean value; P, significance by *t* test. (C) HeLa cells were allowed to bind to different sized microbeads at 48 h after transfection; large one for control and small one for *ATAD5* knockdown. Cells were replated in a single slide chamber and incubated before fixation. Cells were stained with anti-PCNA antibody and analyzed by confocal microscopy. Asterisks mark control knockdown cells bound to large beads. (D) PCNA foci in early S-phase nuclei were quantitatively analyzed for foci signal intensity. The data shown are from a single representative experiment out of three repeats. For the experiment shown,  $n = 5$  for each condition. Red bars in the graph, mean value. A *t* test was performed between the control knockdown cell with maximum mean foci signal intensity and the *ATAD5* knockdown cell with minimum. Bars (all images): 5  $\mu\text{m}$ .

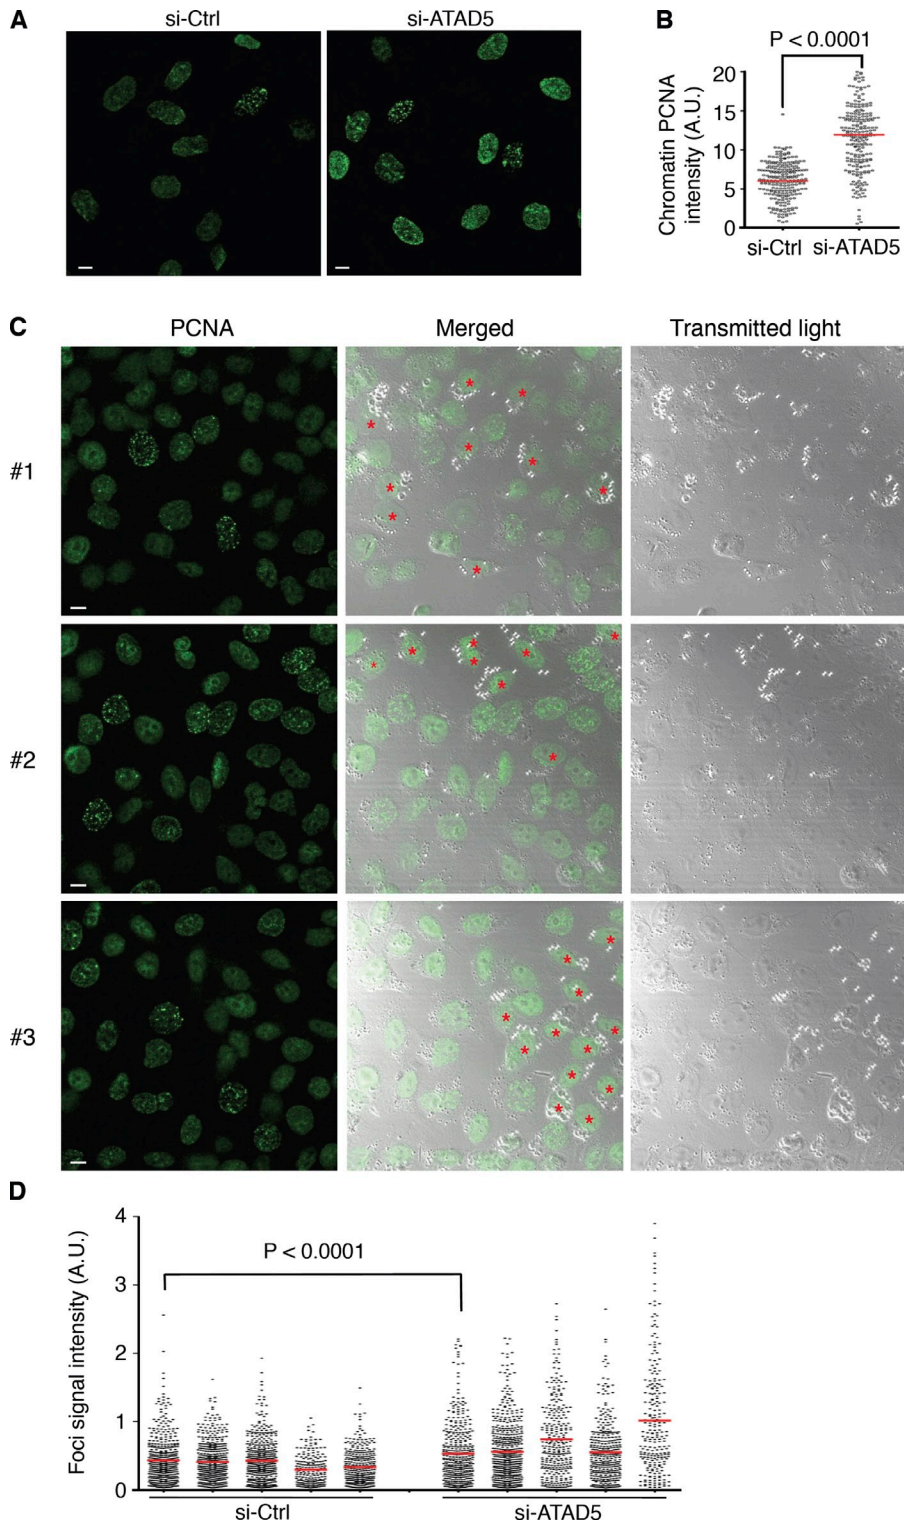

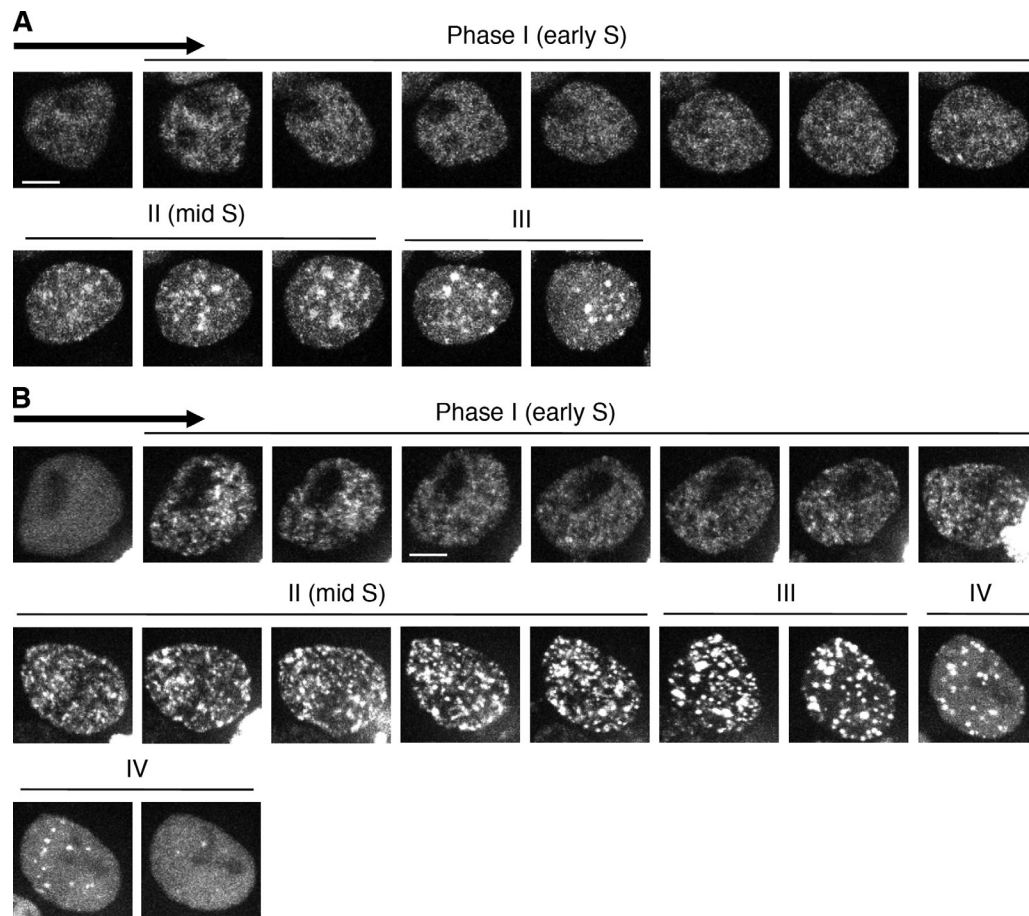

Figure S2. **The consecutive images of a GFP-PCNA-positive cell.** The representative consecutive images of a GFP-PCNA-positive cell with an interval of 60 min were displayed. (A) Control knockdown. (B) ATAD5 knockdown. Bars, 5  $\mu$ m.



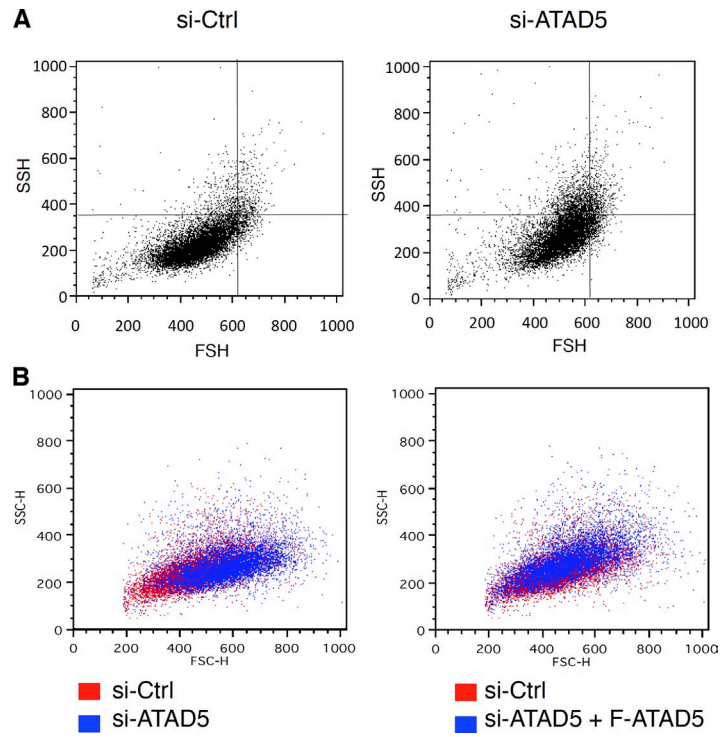

Figure S5. **ATAD5 knockdown increases cellular size.** (A) HeLa cells were transfected with *ATAD5* or control siRNA. The FSC (forward scatter)/SSC (side scatter) plots were obtained with flow cytometry at 72 h after transfection. Three independent experiments were performed and a represented image is presented. The data shown are from a single representative experiment out of five repeats. (B) HeLa cells were cotransfected with a combination of *ATAD5* siRNA and DNA vector expressing FLAG-tagged *ATAD5* (F-*ATAD5*) or empty vector. The FSC/SSC plots were obtained with flow cytometry at 72 h after transfection. The data shown are from a single representative experiment out of three repeats.
